# Supplementary material for: Mechanisms of Arrhythmogenicity of Hypertrophic Cardiomyopathy-Associated Troponin T (TNNT2) Variant I79N
Source: PubMed Central journal article supplement (PMC8718794; doi:10.3389/fcell.2021.787581), 2021-12-17

## Supplemental Figures and Tables Captions

**Table S1. Recombinant protein composition of human cardiac reconstituted thin filaments.** All cTn and RTF utilized in this study were labeled with IAANS at T53C position with the two additional mutations C35S and C84S.

**Table S2. Oligonucleotide sequences for sgRNA, ssODN and PCR primers used for hiPSC genome editing.**

**Table S3. List of 251 transcripts in the customized NanoString codeset.**

**Figure S1. Sequence alignment of the partial cTnT protein among different species.** A multiple sequence alignment of the partial canonical cTnT protein from human (Uniprot ID: P45379), bovine (Uniprot ID: P13789), rabbit (Uniprot ID: P09741), rat (Uniprot ID: P50753), mouse (Uniprot ID: P50752), chicken (Uniprot ID: P02642), and zebrafish (Uniprot ID: Q90Y46) was performed using Clustal Omega. 179 residues are boxed in red and are highly conserved across different species. The human cTnT sequence shown here includes exon 5 which encodes 10 amino acids, which are boxed in blue. Exon 5 is not included in the splice variant normally expressed in the adult heart and so the residue numbers are shifted by ten in this figure.

**Figure S2. Genome-editing to create *TNNT2* I79N<sup>+/-</sup> hiPSC line.** Panel A. Genome editing strategy map in which the relevant portion of the *TNNT2* nucleotide sequence is shown. Residue 79 is within exon 9 and the annealing position of the designed single guide RNA (sg RNA) is shown in orange and the PAM site (TGG) in pink. The donor DNA or single-stranded oligodeoxynucleotide (ssODN) spanned the region shown by the brown (36 bp PAM distal) and green (91 bp PAM proximal) arrows. Panel B. Sanger sequencing of relevant nucleotides. The gene edited nucleotide is shown by the red arrow in which the codon for Isoleucine (I) ATC was genome edited to AAC (Asparagine (N)) in one allele rendering a I79N heterozygous mutant. The blue arrow indicates the silent mutation (C->G) that was included in the sgRNA target sequence to prevent CRISPR from re-cutting the target sequence once the desired edit was introduced. The top 10 sites that scored high for off target or low for on-target were selected using “Custom Alt-R® CRISPR-Cas9 guide RNA tool” from IDT. The top 10 off target sites were then Sanger sequenced to ensure that the probability of off target mutations was minimized.

**Figure S3. The expression of *TNNI3/TNNI1* in WT and I79N<sup>+/-</sup> hiPSC-CMs.**

**Figure S4. Heat map and Principal Component Analysis (PCA) of data from NanoString multiplex gene expression analysis.** Panel A, Heat map of unsupervised hierarchical clustering of all 251 genes. I79N<sup>+/-</sup> mutation is clustering away from WT with low variability within group. Patterns of gene expression are evident through the effect of the mutation. Panel B PCA of normalized gene expression for I79N<sup>+/-</sup> (blue) vs WT (black) hiPSC-CMs shows PC1 and PC2 account for 73% and 16% of the variance, respectively. In PCA, I79N<sup>+/-</sup> samples are clustered away from WT.

**Figure S5. NanoString multiplex gene expression functional analysis. Panels A and B.** Top 5 functional pathways (i.e., enrichment term) based on adjusted p-value (< 0.05) across six gene set libraries. Enrichment analysis was conducted using the 45 upregulated and 23 downregulated differentially expressed genes (DEG) in I79N<sup>+/-</sup> hiPSC-CMs compared to WT hiPSC-CMs. Panels C and D. Top 5 enriched Gene Ontology (GO) terms sorted by adjusted p-value. X-axis represents the combined score (combination of the p-value and the z-score). Y-axis refers to the names of pathways terms split by the gene set libraries. Data point size represents the Odds ratio which is the estimate from Fisher’s exact test calculated

through Enrichr (Chen et al., 2013; Kuleshov et al., 2016). Color gradient refers to the adjusted p-value of each term. GO\_BP: Gene Ontology biological process, GO\_CC: Gene Ontology cellular component, GO\_MF: Gene Ontology molecular function, Hu\_Phenotype: human phenotype, Jensen\_Diseases: disease database from Jensen Lab, MGI\_Phenotype: Mammalian Phenotype Ontology. I79N<sup>+/-</sup> (n=3) to WT (n=4) TNNT2 hiPSC-CMs.

Table S1.

| Construct                                 | Gene Name    | Description                                                                                                                                                        | Length | Molecular Weight (kDa)* | Extinction Coefficient (M <sup>-1</sup> cm <sup>-1</sup> )* | Uniprot ID |
|-------------------------------------------|--------------|--------------------------------------------------------------------------------------------------------------------------------------------------------------------|--------|-------------------------|-------------------------------------------------------------|------------|
| # WT cTnC <sup>T53C</sup>                 | <i>TNNC1</i> | Full length TnC with three mutations (T53C, C35S, C84S) for fluorescence labeling specifically at T53C for functional studies.                                     | 161    | 18                      | 4470                                                        | P63316     |
| <b>Troponin I and Troponin T Subunits</b> |              |                                                                                                                                                                    |        |                         |                                                             |            |
| WT cTnI                                   | <i>TNNI3</i> | Full length WT cTnI.                                                                                                                                               | 211    | 24                      | 9970                                                        | P19429     |
| WT cTnT                                   | <i>TNNT2</i> | Full length WT cTnT (isoform 3).                                                                                                                                   | 288    | 35                      | 16960                                                       | P45379     |
| I79N cTnT                                 | <i>TNNT2</i> | Full length cTnT with I79N mutation.                                                                                                                               |        |                         |                                                             |            |
| <b>Other constructs</b>                   |              |                                                                                                                                                                    |        |                         |                                                             |            |
| Alpha MAS-Tm                              | <i>TPM1</i>  | Full-length Tm with the additional tripeptide (Met-Ala-Ser) to the N-terminus to mimic acetylation process in native Tm and ensure its binding to actin filaments. | 287    | 33                      | 8940                                                        | P09493     |

Both the molecular weight and extinction coefficients were calculated using ProtParam<sup>1</sup>.

# All cTn and RTF utilized in this study were labeled with IAANS at T53C position with the two additional mutations C35S and C84S.

<sup>1</sup>Gasteiger, E. et al. Protein Identification and Analysis Tools on the ExPASy Server. *The Proteomics Protocols Handbook*, 571 (2005).

**Table S2. Oligonucleotide sequences for sgRNA, ssODN and PCR primers used for hiPSC genome editing**

| <b>sgRNA</b>                      |                                                                                                                                             |
|-----------------------------------|---------------------------------------------------------------------------------------------------------------------------------------------|
| <b>I79N - F</b>                   | 5'-CACCGAGTCCACTCTCTCTCCATCG-3'                                                                                                             |
| <b>I79N - R</b>                   | 5'-AAACCGATGGAGAGAGAGTGGACTC-3'                                                                                                             |
| <b>ssODN</b>                      |                                                                                                                                             |
| <b>I79N</b>                       | 5' AGTCCCTGGGTCCAGAATGGGGCTGATGCTGACTATTCCTCTCTCCAACAGGTCGTTTCATGCCCAACTTGGTGCCTCCAAGAATCC<br>CGATGGAGAGAGAGTCTGACTTTGATGTAAGCGGTGGCTGT -3' |
| <b>PCR primers for sequencing</b> |                                                                                                                                             |
| <b>I79 - F</b>                    | 5'-GCTTCTTTGATTCCAAGTTGTGTG-3'                                                                                                              |
| <b>I79 - R</b>                    | 5'-CCCATCCCACCTATGCTC-3'                                                                                                                    |

## NanoString Custom Codeset

Table S3.

|           | <b>Gene Name</b> | <b>Accession no.</b> | <b>Probe Position</b> |  |           | <b>Gene name</b> | <b>Accession no.</b> | <b>Probe Position</b> |
|-----------|------------------|----------------------|-----------------------|--|-----------|------------------|----------------------|-----------------------|
| <b>1</b>  | ABCC8            | NM_000352.4          | 1761-1860             |  | <b>33</b> | CALM3            | NM_005184.2          | 1306-1405             |
| <b>2</b>  | ACADM            | NM_000016.5          | 1290-1389             |  | <b>34</b> | CALR             | NM_004343.2          | 966-1065              |
| <b>3</b>  | ACTA1            | NM_001100.3          | 46-145                |  | <b>35</b> | CaMK2A           | NM_171825.1          | 4081-4180             |
| <b>4</b>  | B actin          | NM_001101.2          | 1011-1110             |  | <b>36</b> | CaMK2B           | NM_001220.3          | 366-465               |
| <b>5</b>  | ACTC1            | NM_005159.4          | 2006-2105             |  | <b>37</b> | CaMK2D           | NM_001221.3          | 1906-2005             |
| <b>6</b>  | ACTN2            | NM_001103.2          | 413-512               |  | <b>38</b> | CaMK2G           | NM_001222.2          | 234-333               |
| <b>7</b>  | ADRB1            | NM_000684.1          | 796-895               |  | <b>39</b> | CASQ2            | NM_001232.3          | 598-697               |
| <b>8</b>  | ADRB2            | NM_000024.3          | 1246-1345             |  | <b>40</b> | CAV3             | NM_001234.3          | 212-311               |
| <b>9</b>  | AKT              | NM_0010144           | 1276-1375             |  | <b>41</b> | CER1             | NM_005454.2          | 589-688               |
| <b>10</b> | ALDH1A1          | NM_000689.3          | 12-111                |  | <b>42</b> | CHRM2            | NM_0010066           | 1171-1270             |
| <b>11</b> | ALDH1A2          | NM_003888.2          | 3131-3230             |  | <b>43</b> | CKB              | NM_001823.4          | 321-420               |
| <b>12</b> | ALDH1A3          | NM_000693.2          | 2281-2380             |  | <b>44</b> | CKM              | NM_001824.4          | 136-235               |
| <b>13</b> | CD13             | NM_001150.1          | 2671-2770             |  | <b>45</b> | COL1A1           | NM_000088.3          | 5211-5310             |
| <b>14</b> | JCTN or          | NM_032466.3          | 396-495               |  | <b>46</b> | COL2A1           | NM_001844.4          | 4746-4845             |
| <b>15</b> | ATP1A2           | NM_000702.3          | 4041-4140             |  | <b>47</b> | COL3A1           | NM_000090.3          | 181-280               |
| <b>16</b> | ATP1A3           | NM_152296.4          | 2626-2725             |  | <b>48</b> | COL4A2           | NM_001846.2          | 1151-1250             |
| <b>17</b> | ATP2A2           | NM_001681.3          | 1397-1496             |  | <b>49</b> | COL4A3           | NM_000091.4          | 1085-1184             |
| <b>18</b> | ATP5F1           | NM_001688.4          | 646-745               |  | <b>50</b> | COL9A2           | NM_001852.3          | 2414-2513             |
| <b>19</b> | B2M              | NM_004048.2          | 26-125                |  | <b>51</b> | CPT1B            | NM_004377.3          | 1655-1754             |
| <b>20</b> | BMP10            | NM_014482.1          | 441-540               |  | <b>52</b> | CRHR2            | NM_001883.2          | 236-335               |
| <b>21</b> | BMP2             | NM_001200.2          | 1516-1615             |  | <b>53</b> | CS               | NM_004077.2          | 741-840               |
| <b>22</b> | BMP4             | NM_001202.3          | 660-759               |  | <b>54</b> | CTNNB1           | NM_0010982           | 1816-1915             |
| <b>23</b> | BRCA1            | NM_007305.2          | 1276-1375             |  | <b>55</b> | CXCR4            | NM_003467.2          | 1336-1435             |
| <b>24</b> | BTAF1            | NM_003972.2          | 1697-1796             |  | <b>56</b> | CYP26A1          | NM_057157.2          | 1591-1690             |
| <b>25</b> | BTK              | NM_000061.1          | 571-670               |  | <b>57</b> | CYP26B1          | NM_019885.2          | 1806-1905             |
| <b>26</b> | CACNA1C          | NM_199460.2          | 4786-4885             |  | <b>58</b> | DKK1             | NM_012242.2          | 76-175                |
| <b>27</b> | CACNA1D          | NM_000720.2          | 5196-5295             |  | <b>59</b> | DYNC111          | NM_0011355           | 1183-1282             |
| <b>28</b> | CACNA1G          | NM_198397.1          | 1381-1480             |  | <b>60</b> | DYNLL2           | NM_080677.2          | 639-738               |
| <b>29</b> | CACNA1H          | NM_021098.2          | 3330-3429             |  | <b>61</b> | EMILIN2          | NM_032048.2          | 1446-1545             |
| <b>30</b> | CACNA2D1         | NM_000722.2          | 2909-3008             |  | <b>62</b> | ERBB2            | NM_0010058           | 1256-1355             |
| <b>31</b> | CALM1            | NM_006888.3          | 1684-1783             |  | <b>63</b> | FGF17            | NM_003867.2          | 280-379               |
| <b>32</b> | CALM2            | NM_001743.3          | 869-968               |  | <b>64</b> | FGF19            | NM_005117.2          | 787-886               |

## NanoString Custom Codeset

|           | <b>Gene name</b>   | <b>Accession number</b> | <b>Probe Position</b> |            | <b>Gene Name</b> | <b>Accession Number</b> | <b>Probe Position</b> |
|-----------|--------------------|-------------------------|-----------------------|------------|------------------|-------------------------|-----------------------|
| <b>65</b> | FGF2               | NM_002006.4             | 621-720               | <b>97</b>  | HOPX             | NM_139212.3             | 511-610               |
| <b>66</b> | FGF4               | NM_002007.2             | 689-788               | <b>98</b>  | HRC              | NM_002152.2             | 367-466               |
| <b>67</b> | FGF8               | NM_033163.3             | 545-644               | <b>99</b>  | IPO8             | NM_006390.2             | 861-960               |
| <b>68</b> | PKBP1B or FKBP12.6 | NM_000801.4             | 41-140                | <b>100</b> | IRX4             | NM_016358.2             | 359-458               |
| <b>69</b> | FLNA               | NM_001456.3             | 7336-7435             | <b>101</b> | ISL1             | NM_002202.2             | 1376-1475             |
| <b>70</b> | FLNB               | NM_001164317.1          | 2125-2224             | <b>102</b> | ISL2             | NM_145805.1             | 109-208               |
| <b>71</b> | FOXA1              | NM_004496.2             | 2466-2565             | <b>103</b> | JAG1             | NM_000214.2             | 916-1015              |
| <b>72</b> | FOXF1              | NM_001451.2             | 1761-1860             | <b>104</b> | JAK1             | NM_002227.1             | 286-385               |
| <b>73</b> | FOXH1              | NM_003923.2             | 696-795               | <b>105</b> | JAK2             | NM_004972.3             | 1465-1564             |
| <b>74</b> | GAPDH              | NM_001256799.1          | 387-486               | <b>106</b> | JAK3             | NM_000215.2             | 1716-1815             |
| <b>75</b> | GATA2              | NM_032638.3             | 1496-1595             | <b>107</b> | JPH2             | NM_020433.4             | 525-624               |
| <b>76</b> | GATA4              | NM_002052.3             | 2141-2240             | <b>108</b> | KCNA4            | NM_002233.3             | 657-756               |
| <b>77</b> | GATA6              | NM_005257.3             | 2131-2230             | <b>109</b> | KCNA5            | NM_002234.2             | 2331-2430             |
| <b>78</b> | GJA1               | NM_000165.3             | 706-805               | <b>110</b> | KCND3            | NM_004980.4             | 1011-1110             |
| <b>79</b> | GJA5               | NM_005266.5             | 1993-2092             | <b>111</b> | KCNH2            | NM_172057.2             | 781-880               |
| <b>80</b> | GJC1               | NM_001080383.1          | 811-910               | <b>112</b> | KCNJ2            | NM_000891.2             | 621-720               |
| <b>81</b> | GNAI1              | NM_002069.4             | 671-770               | <b>113</b> | KCNJ3            | NM_001260508.1          | 429-528               |
| <b>82</b> | GNAI2              | NM_002070.2             | 1001-1100             | <b>114</b> | KCNJ5            | NM_000890.3             | 631-730               |
| <b>83</b> | GNAI3              | NM_006496.1             | 1151-1250             | <b>115</b> | KCNJ8            | NM_004982.2             | 881-980               |
| <b>84</b> | GNAO1              | NM_020988.2             | 1423-1522             | <b>116</b> | KCNK1            | NM_002245.3             | 721-820               |
| <b>85</b> | GNAS               | NM_080425.1             | 1911-2010             | <b>117</b> | KCNK3            | XM_005264293.1          | 667-766               |
| <b>86</b> | GREM2              | NM_022469.3             | 3006-3105             | <b>118</b> | KCNK5            | NM_003740.3             | 3616-3715             |
| <b>87</b> | GYPA               | NM_002099.4             | 2312-2411             | <b>119</b> | KCNN1            | NM_002248.3             | 703-802               |
| <b>88</b> | HAND1              | NM_004821.2             | 1231-1330             | <b>120</b> | KCNN2            | NM_021614.2             | 1893-1992             |
| <b>89</b> | HAND2              | NM_021973.2             | 1822-1921             | <b>121</b> | KCNN3            | NM_002249.4             | 2636-2735             |
| <b>90</b> | HAS2               | NM_005328.2             | 961-1060              | <b>122</b> | KCNQ1            | NM_181798.1             | 836-935               |
| <b>91</b> | HCN1               | NM_021072.2             | 1451-1550             | <b>123</b> | KDR              | NM_002253.2             | 1421-1520             |
| <b>92</b> | HCN2               | NM_001194.3             | 2075-2174             | <b>124</b> | KIF20A           | NM_005733.2             | 1210-1309             |
| <b>93</b> | HCN4               | NM_005477.2             | 4911-5010             | <b>125</b> | KIT              | NM_000222.1             | 6-105                 |
| <b>94</b> | HEY1               | NM_012258.3             | 586-685               | <b>126</b> | KLF4**           | NM_004235.4             | 1981-2080             |
| <b>95</b> | HEY2               | NM_012259.2             | 1576-1675             | <b>127</b> | KMT2A            | NM_005933.2             | 14001-14100           |
| <b>96</b> | HIF1A              | NM_001530.2             | 1986-2085             | <b>128</b> | KMT2B            | NM_014727.1             | 7846-7945             |

## NanoString Custom Codeset

|     | Gene Name  | Accession Number | Probe Position |  |     | Gene    | Accession      | Probe Position |
|-----|------------|------------------|----------------|--|-----|---------|----------------|----------------|
| 129 | KMT2C      | NM_170606.2      | 11974-12073    |  | 161 | NR2F1   | NM_005654.4    | 3111-3210      |
| 130 | KMT2D      | NM_003482.3      | 6071-6170      |  | 162 | NR2F2   | NM_021005.2    | 1531-1630      |
| 131 | LDHA       | NM_001165414.1   | 1691-1790      |  | 163 | ORAI1   | NM_032790.3    | 911-1010       |
| 132 | LEFTY1     | NM_020997.2      | 1406-1505      |  | 164 | PDGFRA  | NM_006206.3    | 1926-2025      |
| 133 | LIN28      | NM_024674.4      | 1961-2060      |  | 165 | PDK2    | NM_002611.3    | 436-535        |
| 134 | JNK3       | NM_138981.2      | 451-550        |  | 166 | PDK4    | NM_002612.3    | 1676-1775      |
| 135 | JNK1-alpha | NM_002750.2      | 946-1045       |  | 167 | p110a   | NM_006218.2    | 2446-2545      |
| 136 | JNK2-alpha | XM_005265940.1   | 164-263        |  | 168 | PITX2   | NM_000325.5    | 1382-1481      |
| 137 | MEF2c      | NM_002397.3      | 2446-2545      |  | 169 | PKP2    | NM_001005242.2 | 1692-1791      |
| 138 | MESP1      | NM_018670.3      | 865-964        |  | 170 | PLCB1   | NM_182734.1    | 171-270        |
| 139 | MIXL1      | NM_031944.1      | 419-518        |  | 171 | PLCB2   | NM_004573.2    | 411-510        |
| 140 | IP3R       | NM_130385.2      | 3056-3155      |  | 172 | PLCD1   | NM_006225.3    | 2126-2225      |
| 141 | MSX2       | NM_002449.4      | 31-130         |  | 173 | PLCD3   | NM_133373.4    | 1308-1407      |
| 142 | MYBPC3     | NM_000256.3      | 3429-3528      |  | 174 | PLCE1   | NM_001165979.1 | 393-492        |
| 143 | MYC**      | NM_002467.3      | 1611-1710      |  | 175 | PLCG1   | NM_002660.2    | 2291-2390      |
| 144 | MYH6       | NM_002471.3      | 928-1027       |  | 176 | PLCG2   | NM_002661.2    | 526-625        |
| 145 | MYH7       | NM_000257.2      | 1917-2016      |  | 177 | PLN     | NM_002667.3    | 213-312        |
| 146 | MYL2       | NM_000432.3      | 721-820        |  | 178 | POLR2A  | NM_000937.2    | 3776-3875      |
| 147 | MYL7       | XM_005249817.2   | 339-438        |  | 179 | POU3F4  | NM_000307.3    | 78-177         |
| 148 | MYO1E      | NM_004998.2      | 4556-4655      |  | 180 | POU5F1  | NM_002701.4    | 1226-1325      |
| 149 | NANOG**    | NM_024865.2      | 1101-1200      |  | 181 | PPIA    | NM_021130.3    | 316-415        |
| 150 | NCAM1      | NM_000615.5      | 1621-1720      |  | 182 | PPP1CA  | NM_002708.3    | 506-605        |
| 151 | NFATC4     | NM_001136022.2   | 2297-2396      |  | 183 | PPP2CA  | NM_002715.2    | 1076-1175      |
| 152 | NKX2-5     | NM_004387.3      | 219-318        |  | 184 | PPP3CB  | NM_021132.2    | 271-370        |
| 153 | NNT        | NM_012343.3      | 2431-2530      |  | 185 | PRKACA  | NM_002730.3    | 401-500        |
| 154 | NODAL      | NM_018055.3      | 321-420        |  | 186 | PRKACB  | NM_182948.2    | 806-905        |
| 155 | NOTCH1     | NM_017617.3      | 8212-8311      |  | 187 | PRKACG  | NM_002732.2    | 776-875        |
| 156 | NOTCH2     | NM_024408.3      | 2843-2942      |  | 188 | PRKAR1A | NM_212472.1    | 368-467        |
| 157 | NOTCH3     | NM_000435.2      | 1966-2065      |  | 189 | PRKAR1B | NM_001164759.1 | 1113-1212      |
| 158 | NOTCH4     | NM_004557.3      | 6421-6520      |  | 190 | PRKAR2A | NM_004157.2    | 479-578        |
| 159 | NPPA       | NM_006172.2      | 116-215        |  | 191 | PRKAR2B | NM_002736.2    | 1351-1450      |
| 160 | NPPB       | NM_002521.2      | 497-596        |  | 192 | PRKCA   | NM_002737.2    | 681-780        |

## NanoString Custom Codeset

|            | Gene Name    | Accession no.  | Probe Position |  |            | Gene Name       | Accession no.  | Probe Position |
|------------|--------------|----------------|----------------|--|------------|-----------------|----------------|----------------|
| <b>193</b> | PRKCB        | NM_212535.1    | 1751-1850      |  | <b>225</b> | T               | NM_003181.2    | 1837-1936      |
| <b>194</b> | PRKCG        | NM_002739.3    | 446-545        |  | <b>226</b> | TEC             | NM_003215.1    | 1231-1330      |
| <b>195</b> | PKG1         | NM_006258.3    | 995-1094       |  | <b>227</b> | CD90            | NM_006288.2    | 136-235        |
| <b>196</b> | PTGS2        | NM_000963.1    | 496-595        |  | <b>228</b> | TNNI1           | NM_003281.3    | 976-1075       |
| <b>197</b> | RARA         | NM_001033603.1 | 1191-1290      |  | <b>229</b> | TNNI3           | NM_000363.4    | 226-325        |
| <b>198</b> | RARB         | NM_000965.3    | 2756-2855      |  | <b>230</b> | TNNT2 exon 5    | NM_000364.3    | 132-231        |
| <b>199</b> | RARG         | NM_000966.3    | 1541-1640      |  | <b>231</b> | TNNT2           | NM_001276346.1 | 797-896        |
| <b>200</b> | RBM20        | NM_001134363.1 | 6943-7042      |  | <b>232</b> | TOP2A           | NM_001067.3    | 3564-3663      |
| <b>201</b> | ROR2         | NM_004560.2    | 736-835        |  | <b>233</b> | TPM1            | NM_000366.5    | 843-942        |
| <b>202</b> | RPS13        | NM_001017.2    | 332-431        |  | <b>234</b> | TRDN            | NM_001251987.1 | 297-396        |
| <b>203</b> | RYR2         | NM_001035.2    | 1184-1283      |  | <b>235</b> | TRH             | NM_007117.2    | 1883-1982      |
| <b>204</b> | SCN4A        | NM_000334.4    | 6787-6886      |  | <b>236</b> | TRPC1           | NM_003304.4    | 991-1090       |
| <b>205</b> | SCN5A        | NM_198056.2    | 8341-8440      |  | <b>237</b> | TRPC2           | NR_002720.2    | 561-660        |
| <b>206</b> | SGK1         | NM_005627.2    | 1791-1890      |  | <b>238</b> | TRPC3           | NM_001130698.1 | 1479-1578      |
| <b>207</b> | SHOX2        | NM_003030.3    | 830-929        |  | <b>239</b> | TRPC4           | NM_001135956.1 | 2436-2535      |
| <b>208</b> | SIRPA        | NM_080792.2    | 3116-3215      |  | <b>240</b> | TRPC5           | NM_012471.2    | 3686-3785      |
| <b>209</b> | SLC16A1      | NM_003051.3    | 636-735        |  | <b>241</b> | TRPC6           | NM_004621.5    | 1001-1100      |
| <b>210</b> | SLC2A1/GLUT1 | NM_006516.2    | 2501-2600      |  | <b>242</b> | TRPC7           | NM_001167576.1 | 1119-1218      |
| <b>211</b> | SLC2A4/GLUT4 | NM_001042.2    | 2121-2220      |  | <b>243</b> | TSHR            | NM_001018036.2 | 736-835        |
| <b>212</b> | SLC8A1       | NM_021097.1    | 441-540        |  | <b>244</b> | SSEA5           | NM_001270483.1 | 1007-1106      |
| <b>213</b> | SLN          | NM_003063.2    | 376-475        |  | <b>245</b> | TTN b           | NM_003319.4    | 1805-1904      |
| <b>214</b> | SOX2         | NM_003106.2    | 152-251        |  | <b>246</b> | TTN             | XM_024453094.1 | 33791-33890    |
| <b>215</b> | SPCS1        | NM_014041.3    | 611-710        |  | <b>247</b> | VCAM-1          | NM_001078.3    | 2536-2635      |
| <b>216</b> | STIM1        | NM_003156.3    | 3101-3200      |  | <b>248</b> | VEGFA           | NM_001025366.1 | 1326-1425      |
| <b>217</b> | TACR1        | NM_015727.1    | 856-955        |  | <b>249</b> | WNT3            | NM_030753.3    | 1336-1435      |
| <b>218</b> | TACR3        | NM_001059.1    | 471-570        |  | <b>250</b> | WNT3A           | NM_033131.2    | 699-798        |
| <b>219</b> | TBX1         | NM_080646.1    | 541-640        |  | <b>251</b> | ZFP42 (or REX1) | NM_174900.3    | 946-1045       |
| <b>220</b> | TBX18        | NM_001080508.2 | 545-644        |  |            |                 |                |                |
| <b>221</b> | TBX2         | NM_005994.3    | 936-1035       |  |            |                 |                |                |
| <b>222</b> | TBX20        | NM_020417.1    | 661-760        |  |            |                 |                |                |
| <b>223</b> | TBX3         | NM_005996.3    | 3276-3375      |  |            |                 |                |                |
| <b>224</b> | TBX5         | NM_080718.1    | 246-345        |  |            |                 |                |                |



Figure S1.

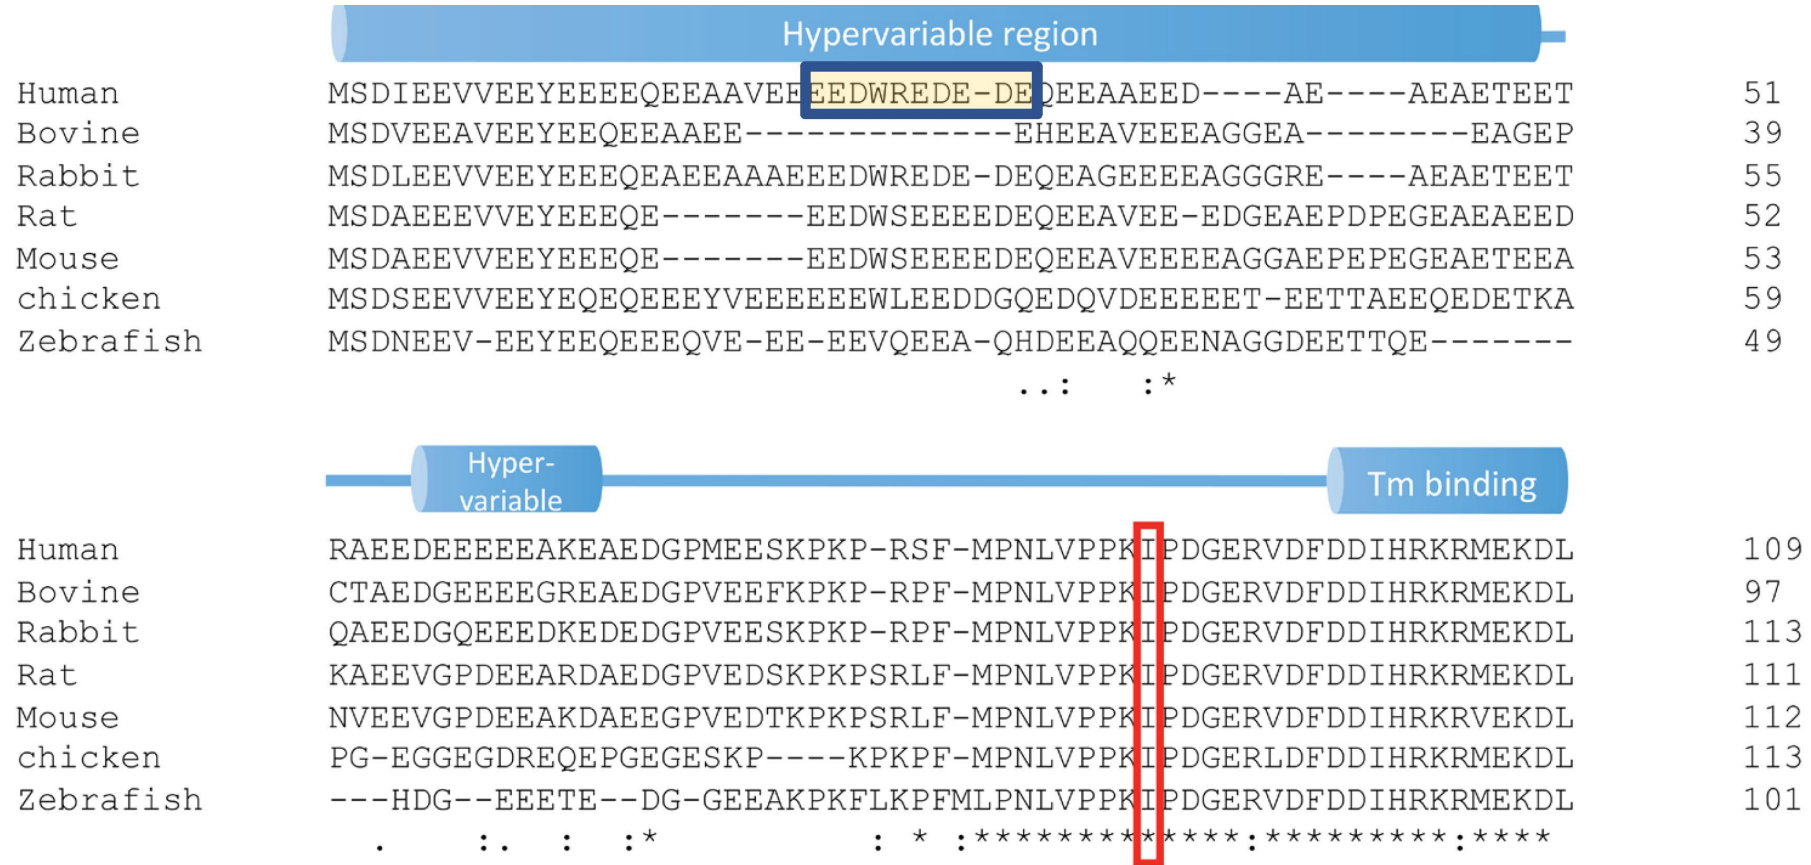

Figure S2.

A.

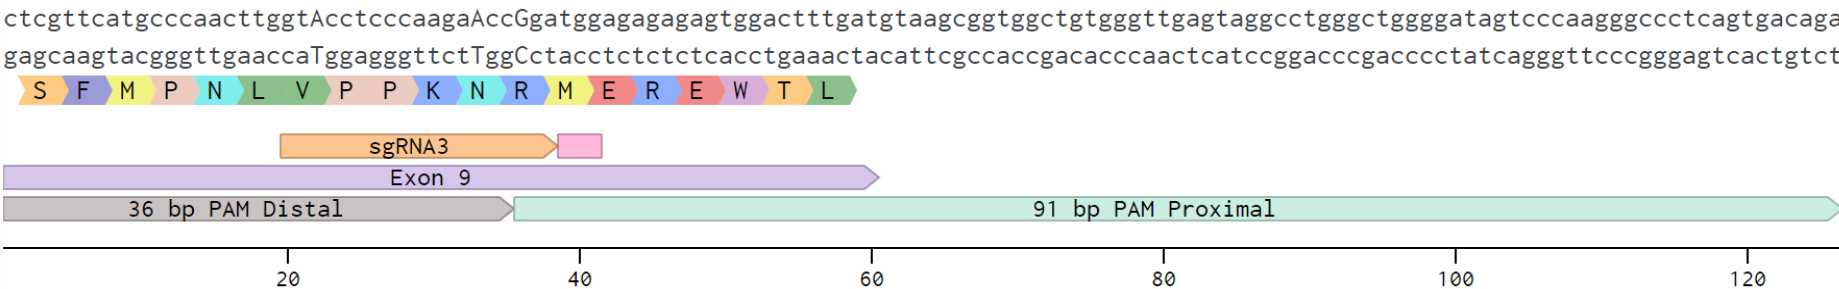

B.

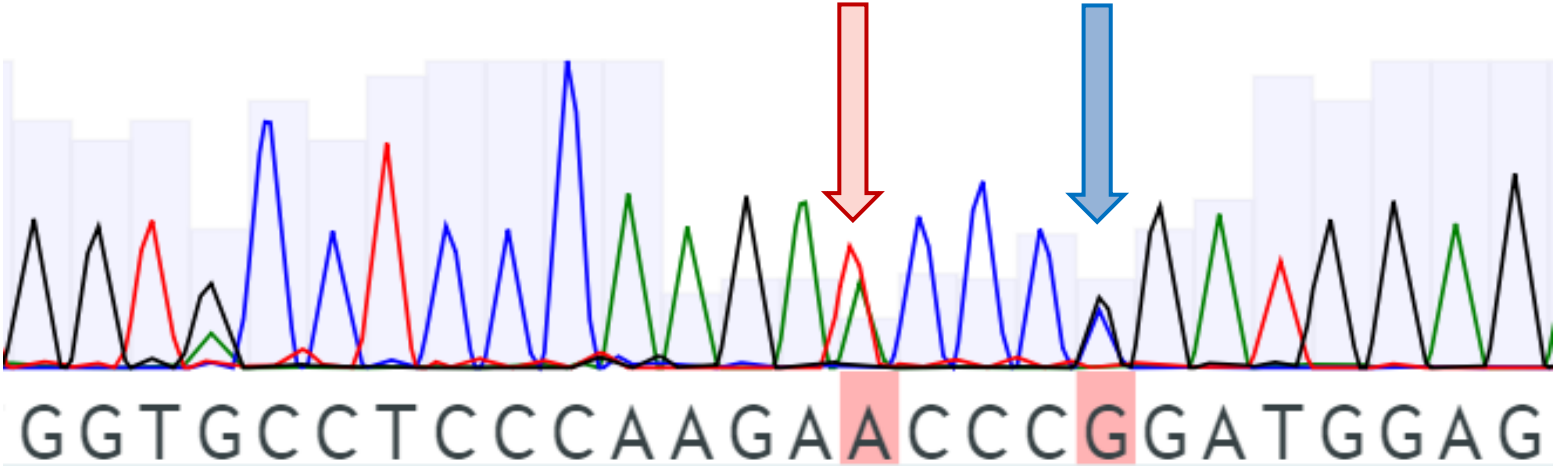

Figure S3.

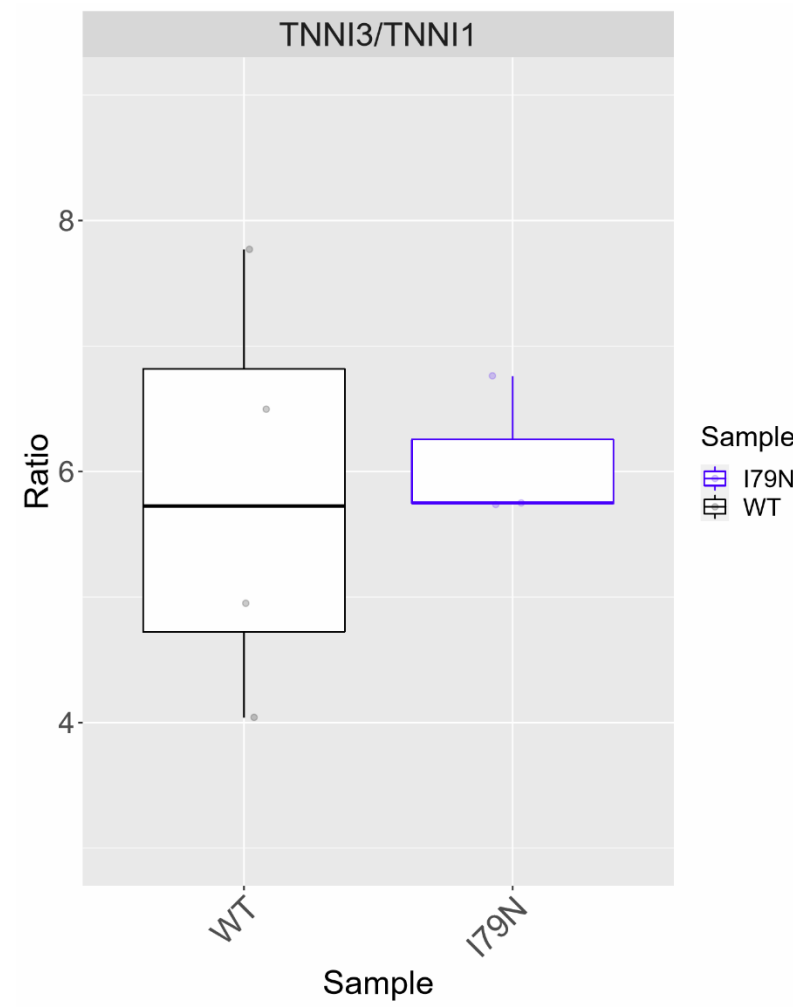

Figure S4.

A.

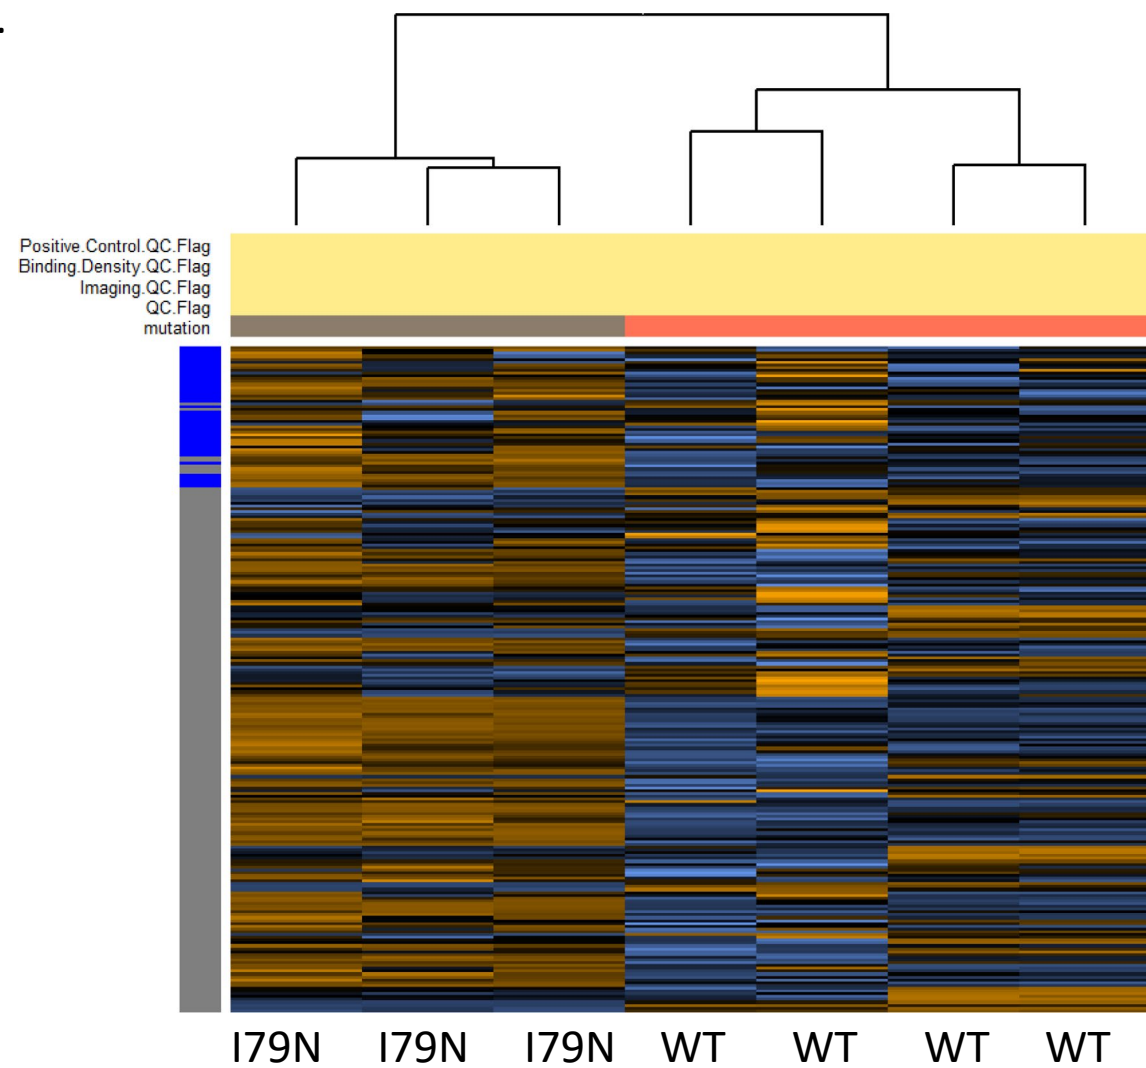

B.

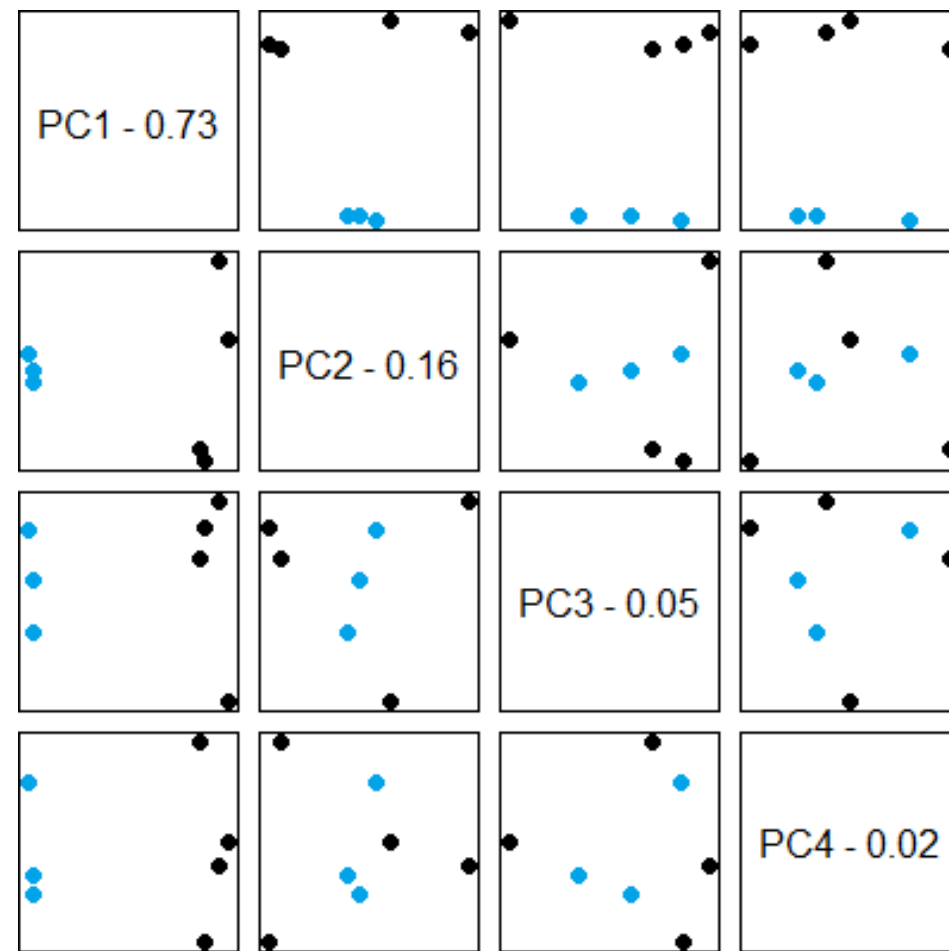

Figure S5

A.

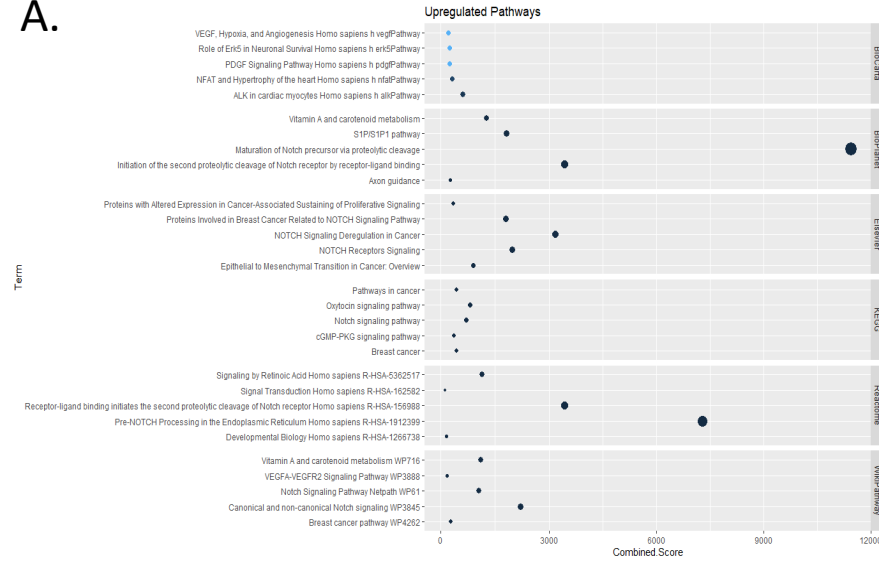

B.

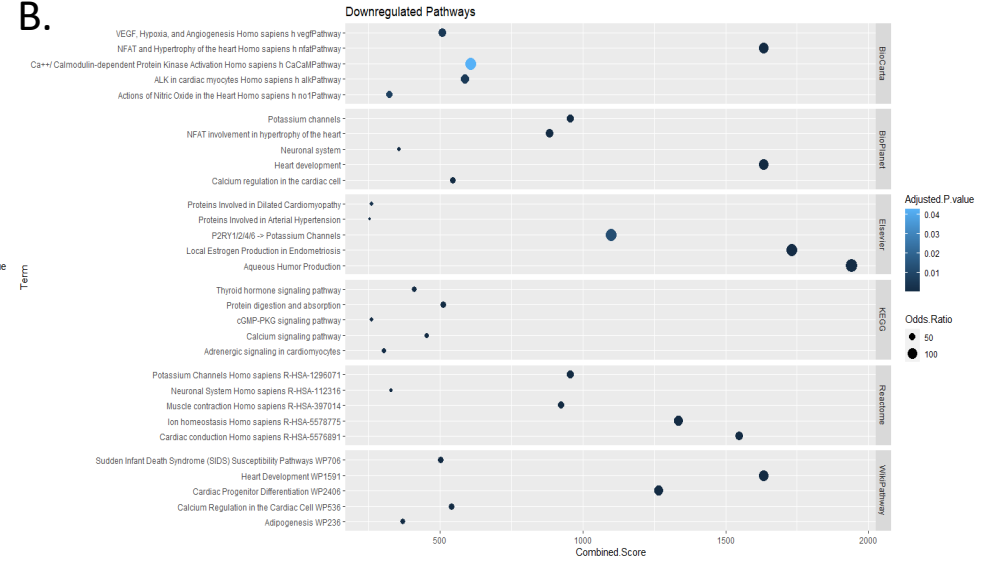

C.

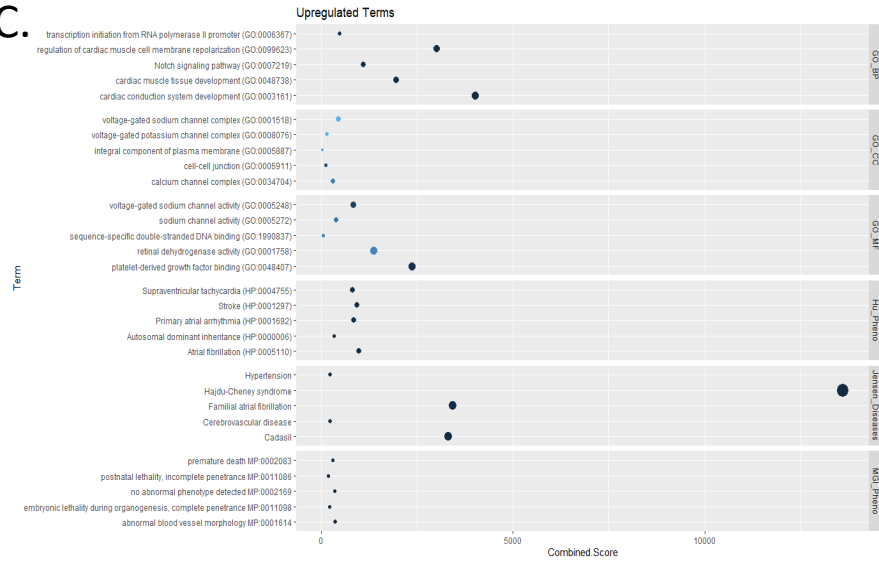

D.

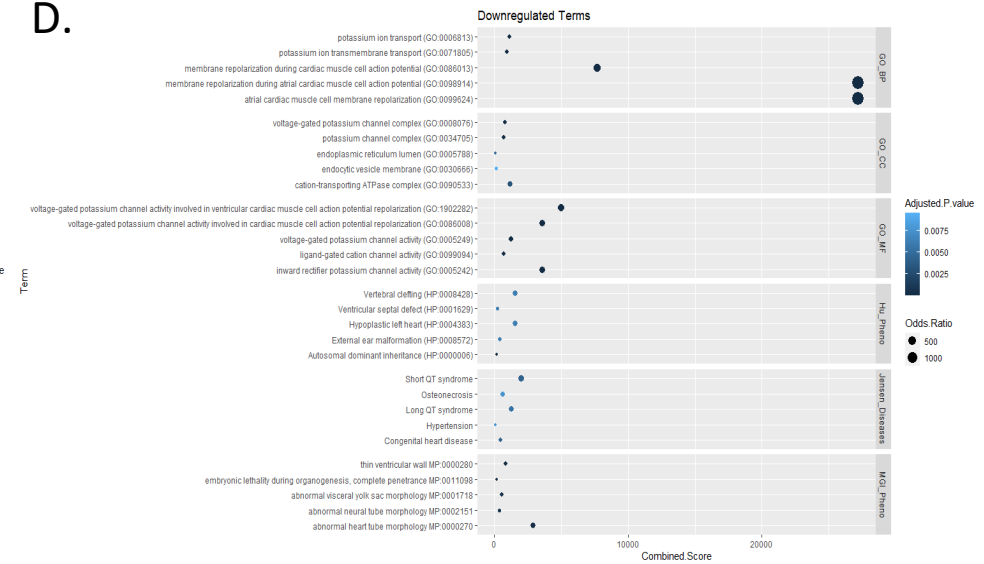

Supplement: DataSheet1.pdf [file DataSheet1.pdf]
